# Supplementary material for: BDNF, DRD4, and HTR2A Gene Allele Frequency Distribution and Association with Mental Illnesses in the European Part of Russia
Source: MDPI journal article supplement (doi:10.3390/genes15020240), 2024-02-14
Supplement: s1 [file s1]

## Supplementary materials

**Table S1:** Analysis of the association of allele frequency with the study groups (mental disorders to controls).

| BDNF rs6265 association with response Group (n=2366, crude analysis)     |          |             |                  |                  |         |        |        |
|--------------------------------------------------------------------------|----------|-------------|------------------|------------------|---------|--------|--------|
| Model                                                                    | Genotype | Control     | Mental Disorders | OR (95% CI)      | P-value | AIC    | BIC    |
| Codominant                                                               | C/C      | 519 (69.4%) | 1213 (75%)       | 1.00             | 0.014   | 2949.9 | 2967.2 |
|                                                                          | C/T      | 207 (27.7%) | 373 (23.1%)      | 0.77 (0.63-0.94) |         |        |        |
|                                                                          | T/T      | 22 (2.9%)   | 32 (2%)          | 0.62 (0.36-1.08) |         |        |        |
| Dominant                                                                 | C/C      | 519 (69.4%) | 1213 (75%)       | 1.00             | 0.0046  | 2948.4 | 2960   |
|                                                                          | C/T–T/T  | 229 (30.6%) | 405 (25%)        | 0.76 (0.62-0.92) |         |        |        |
| Recessive                                                                | C/C–C/T  | 726 (97.1%) | 1586 (98%)       | 1.00             | 0.15    | 2954.4 | 2965.9 |
|                                                                          | T/T      | 22 (2.9%)   | 32 (2%)          | 0.67 (0.38-1.15) |         |        |        |
| Overdominant                                                             | C/C-T/T  | 541 (72.3%) | 1245 (77%)       | 1.00             | 0.016   | 2950.6 | 2962.2 |
|                                                                          | C/T      | 207 (27.7%) | 373 (23.1%)      | 0.78 (0.64-0.95) |         |        |        |
| BDNF rs10835210 association with response Group (n=2311, crude analysis) |          |             |                  |                  |         |        |        |
| Model                                                                    | Genotype | Control     | Mental Disorders | OR (95% CI)      | P-value | AIC    | BIC    |
| Codominant                                                               | A/A      | 170 (23.8%) | 418 (26.2%)      | 1.00             | 0.22    | 2859   | 2876.2 |
|                                                                          | C/A      | 346 (48.5%) | 789 (49.4%)      | 0.93 (0.75-1.15) |         |        |        |
|                                                                          | C/C      | 197 (27.6%) | 391 (24.5%)      | 0.81 (0.63-1.03) |         |        |        |
| Dominant                                                                 | A/A      | 170 (23.8%) | 418 (26.2%)      | 1.00             | 0.24    | 2858.6 | 2870.1 |
|                                                                          | C/A-C/C  | 543 (76.2%) | 1180 (73.8%)     | 0.88 (0.72-1.09) |         |        |        |
| Recessive                                                                | A/A-C/A  | 516 (72.4%) | 1207 (75.5%)     | 1.00             | 0.11    | 2857.4 | 2868.9 |
|                                                                          | C/C      | 197 (27.6%) | 391 (24.5%)      | 0.85 (0.69-1.04) |         |        |        |
| Overdominant                                                             | A/A-C/C  | 367 (51.5%) | 809 (50.6%)      | 1.00             | 0.71    | 2859.9 | 2871.4 |
|                                                                          | C/A      | 346 (48.5%) | 789 (49.4%)      | 1.03 (0.87-1.23) |         |        |        |
| HTR2A rs6313 association with response Group (n=2257, crude analysis)    |          |             |                  |                  |         |        |        |
| Model                                                                    | Genotype | Control     | Mental Disorders | OR (95% CI)      | P-value | AIC    | BIC    |
| Codominant                                                               | G/G      | 289 (38.8%) | 652 (43.1%)      | 1.00             | 0.065   | 2863.5 | 2880.7 |
|                                                                          | G/A      | 345 (46.3%) | 677 (44.8%)      | 0.87 (0.72-1.05) |         |        |        |
|                                                                          | A/A      | 111 (14.9%) | 183 (12.1%)      | 0.73 (0.56-0.96) |         |        |        |
| Dominant                                                                 | G/G      | 289 (38.8%) | 652 (43.1%)      | 1.00             | 0.049   | 2863.1 | 2874.5 |
|                                                                          | G/A-A/A  | 456 (61.2%) | 860 (56.9%)      | 0.84 (0.70-1.00) |         |        |        |
| Recessive                                                                | G/G-G/A  | 634 (85.1%) | 1329 (87.9%)     | 1.00             | 0.066   | 2863.6 | 2875   |
|                                                                          | A/A      | 111 (14.9%) | 183 (12.1%)      | 0.79 (0.61-1.01) |         |        |        |
| Overdominant                                                             | G/G-A/A  | 400 (53.7%) | 835 (55.2%)      | 1.00             | 0.49    | 2866.5 | 2877.9 |
|                                                                          | G/A      | 345 (46.3%) | 677 (44.8%)      | 0.94 (0.79-1.12) |         |        |        |
| DRD4 rs1800955 association with response Group (n=2278, crude analysis)  |          |             |                  |                  |         |        |        |
| Model                                                                    | Genotype | Control     | Mental Disorders | OR (95% CI)      | P-value | AIC    | BIC    |
| Codominant                                                               | T/T      | 238 (34%)   | 432 (27.4%)      | 1.00             | 0.0031  | 2803.4 | 2820.6 |
|                                                                          | T/C      | 328 (46.9%) | 783 (49.6%)      | 1.32 (1.07-1.61) |         |        |        |
|                                                                          | C/C      | 133 (19%)   | 364 (23.1%)      | 1.51 (1.17-1.94) |         |        |        |
| Dominant                                                                 | T/T      | 238 (34%)   | 432 (27.4%)      | 1.00             | 0.0013  | 2802.7 | 2814.2 |
|                                                                          | T/C-C/C  | 461 (66%)   | 1147 (72.6%)     | 1.37 (1.13-1.66) |         |        |        |
| Recessive                                                                | T/T-T/C  | 566 (81%)   | 1215 (77%)       | 1.00             | 0.03    | 2808.3 | 2819.8 |
|                                                                          | C/C      | 133 (19%)   | 364 (23.1%)      | 1.27 (1.02-1.59) |         |        |        |
| Overdominant                                                             | T/T-C/C  | 371 (53.1%) | 796 (50.4%)      | 1.00             | 0.24    | 2811.6 | 2823.1 |
|                                                                          | T/C      | 328 (46.9%) | 783 (49.6%)      | 1.11 (0.93-1.33) |         |        |        |

AIC - Akaike information criterion; BIC - Bayesian information criterion; OR - Odds ratio; P-value < 0.05 was considered as significance;

**Table S2:** Analysis of the association of allele frequency with the study groups (Control to Mood disorders).

| BDNFRs6265 association with response Diagnosis (n=964, crude analysis)      |          |             |                |                  |         |        |        |
|-----------------------------------------------------------------------------|----------|-------------|----------------|------------------|---------|--------|--------|
| Model                                                                       | Genotype | Control     | Mood Disorders | OR (95% CI)      | P-value | AIC    | BIC    |
| Codominant                                                                  | C/C      | 519 (69.4%) | 159 (73.6%)    | 1.00             | 0.47    | 1030.2 | 1044.8 |
|                                                                             | C/T      | 207 (27.7%) | 51 (23.6%)     | 0.80 (0.56-1.15) |         |        |        |
|                                                                             | T/T      | 22 (2.9%)   | 6 (2.8%)       | 0.89 (0.35-2.23) |         |        |        |
| Dominant                                                                    | C/C      | 519 (69.4%) | 159 (73.6%)    | 1.00             | 0.23    | 1028.3 | 1038   |
|                                                                             | C/T–T/T  | 229 (30.6%) | 57 (26.4%)     | 0.81 (0.58-1.14) |         |        |        |
| Recessive                                                                   | C/C–C/T  | 726 (97.1%) | 210 (97.2%)    | 1.00             | 0.9     | 1029.7 | 1039.4 |
|                                                                             | T/T      | 22 (2.9%)   | 6 (2.8%)       | 0.94 (0.38-2.36) |         |        |        |
| Overdominant                                                                | C/C-T/T  | 541 (72.3%) | 165 (76.4%)    | 1.00             | 0.23    | 1028.3 | 1038   |
|                                                                             | C/T      | 207 (27.7%) | 51 (23.6%)     | 0.81 (0.57-1.15) |         |        |        |
| BDNF rs10835210 association with response Diagnosis (n=930, crude analysis) |          |             |                |                  |         |        |        |
| Model                                                                       | Genotype | Control     | Mood Disorders | OR (95% CI)      | P-value | AIC    | BIC    |
| Codominant                                                                  | C/C      | 197 (27.6%) | 49 (22.6%)     | 1.00             | 0.087   | 1011.6 | 1026.1 |
|                                                                             | C/A      | 346 (48.5%) | 101 (46.5%)    | 1.17 (0.80-1.72) |         |        |        |
|                                                                             | A/A      | 170 (23.8%) | 67 (30.9%)     | 1.58 (1.04-2.42) |         |        |        |
| Dominant                                                                    | C/C      | 197 (27.6%) | 49 (22.6%)     | 1.00             | 0.14    | 1012.3 | 1021.9 |
|                                                                             | C/A-A/A  | 516 (72.4%) | 168 (77.4%)    | 1.31 (0.92-1.87) |         |        |        |
| Recessive                                                                   | C/C-C/A  | 543 (76.2%) | 150 (69.1%)    | 1.00             | 0.04    | 1010.3 | 1019.9 |
|                                                                             | A/A      | 170 (23.8%) | 67 (30.9%)     | 1.43 (1.02-2.00) |         |        |        |
| Overdominant                                                                | C/C-A/A  | 367 (51.5%) | 116 (53.5%)    | 1.00             | 0.61    | 1014.2 | 1023.9 |
|                                                                             | C/A      | 346 (48.5%) | 101 (46.5%)    | 0.92 (0.68-1.25) |         |        |        |
| HTR2A rs6313 association with response Diagnosis (n=949, crude analysis)    |          |             |                |                  |         |        |        |
| Model                                                                       | Genotype | Control     | Mood Disorders | OR (95% CI)      | P-value | AIC    | BIC    |
| Codominant                                                                  | G/G      | 289 (38.8%) | 78 (38.2%)     | 1.00             | 0.17    | 990.3  | 1004.9 |
|                                                                             | G/A      | 345 (46.3%) | 105 (51.5%)    | 1.13 (0.81-1.57) |         |        |        |
|                                                                             | A/A      | 111 (14.9%) | 21 (10.3%)     | 0.70 (0.41-1.19) |         |        |        |
| Dominant                                                                    | G/G      | 289 (38.8%) | 78 (38.2%)     | 1.00             | 0.88    | 991.8  | 1001.5 |
|                                                                             | G/A-A/A  | 456 (61.2%) | 126 (61.8%)    | 1.02 (0.74-1.41) |         |        |        |
| Recessive                                                                   | G/G-G/A  | 634 (85.1%) | 183 (89.7%)    | 1.00             | 0.083   | 988.8  | 998.5  |
|                                                                             | A/A      | 111 (14.9%) | 21 (10.3%)     | 0.66 (0.40-1.07) |         |        |        |
| Overdominant                                                                | G/G-A/A  | 400 (53.7%) | 99 (48.5%)     | 1.00             | 0.19    | 990.1  | 999.8  |
|                                                                             | G/A      | 345 (46.3%) | 105 (51.5%)    | 1.23 (0.90-1.68) |         |        |        |
| DRD4 rs1800955 association with response Diagnosis (n=909, crude analysis)  |          |             |                |                  |         |        |        |
| Model                                                                       | Genotype | Control     | Mood Disorders | OR (95% CI)      | P-value | AIC    | BIC    |
| Codominant                                                                  | T/T      | 238 (34%)   | 51 (24.3%)     | 1.00             | 0.024   | 981.2  | 995.7  |
|                                                                             | T/C      | 328 (46.9%) | 115 (54.8%)    | 1.64 (1.13-2.37) |         |        |        |
|                                                                             | C/C      | 133 (19%)   | 44 (20.9%)     | 1.54 (0.98-2.44) |         |        |        |
| Dominant                                                                    | T/T      | 238 (34%)   | 51 (24.3%)     | 1.00             | 0.0067  | 979.3  | 988.9  |
|                                                                             | T/C-C/C  | 461 (66%)   | 159 (75.7%)    | 1.61 (1.13-2.29) |         |        |        |
| Recessive                                                                   | T/T-T/C  | 566 (81%)   | 166 (79%)      | 1.00             | 0.54    | 986.3  | 995.9  |
|                                                                             | C/C      | 133 (19%)   | 44 (20.9%)     | 1.13 (0.77-1.65) |         |        |        |
| Overdominant                                                                | T/T-C/C  | 371 (53.1%) | 95 (45.2%)     | 1.00             | 0.046   | 982.7  | 992.3  |
|                                                                             | T/C      | 328 (46.9%) | 115 (54.8%)    | 1.37 (1.00-1.87) |         |        |        |

AIC - Akaike information criterion; BIC - Bayesian information criterion; OR - Odds ratio; P-value < 0.05 was considered as significance;

**Table S3:** Analysis of the association of allele frequency with the study groups (Control to Schizophrenia spectrum disorders).

| BDNF rs6265 association with response Diagnosis (n=2150, crude analysis)     |          |             |                                  |                  |         |        |        |
|------------------------------------------------------------------------------|----------|-------------|----------------------------------|------------------|---------|--------|--------|
| Model                                                                        | Genotype | Control     | Schizophrenia spectrum disorders | OR (95% CI)      | P-value | AIC    | BIC    |
| Codominant                                                                   | C/C      | 519 (69.4%) | 1054 (75.2%)                     | 1.00             | 0.011   | 2775.4 | 2792.4 |
|                                                                              | C/T      | 207 (27.7%) | 322 (23%)                        | 0.77 (0.62-0.94) |         |        |        |
|                                                                              | T/T      | 22 (2.9%)   | 26 (1.8%)                        | 0.58 (0.33-1.04) |         |        |        |
| Dominant                                                                     | C/C      | 519 (69.4%) | 1054 (75.2%)                     | 1.00             | 0.0041  | 2774.2 | 2785.5 |
|                                                                              | C/T-T/T  | 229 (30.6%) | 348 (24.8%)                      | 0.75 (0.61-0.91) |         |        |        |
| Recessive                                                                    | C/C-C/T  | 726 (97.1%) | 1376 (98.2%)                     | 1.00             | 0.11    | 2779.9 | 2791.2 |
|                                                                              | T/T      | 22 (2.9%)   | 26 (1.8%)                        | 0.62 (0.35-1.11) |         |        |        |
| Overdominant                                                                 | C/C-T/T  | 541 (72.3%) | 1080 (77%)                       | 1.00             | 0.016   | 2776.7 | 2788   |
|                                                                              | C/T      | 207 (27.7%) | 322 (23%)                        | 0.78 (0.64-0.95) |         |        |        |
| BDNF rs10835210 association with response Diagnosis (n=2094, crude analysis) |          |             |                                  |                  |         |        |        |
| Model                                                                        | Genotype | Control     | Schizophrenia spectrum disorders | OR (95% CI)      | P-value | AIC    | BIC    |
| Codominant                                                                   | C/C      | 197 (27.6%) | 342 (24.8%)                      | 1.00             | 0.35    | 2689.9 | 2706.9 |
|                                                                              | C/A      | 346 (48.5%) | 688 (49.8%)                      | 1.15 (0.92-1.42) |         |        |        |
|                                                                              | A/A      | 170 (23.8%) | 351 (25.4%)                      | 1.19 (0.92-1.53) |         |        |        |
| Dominant                                                                     | C/C      | 197 (27.6%) | 342 (24.8%)                      | 1.00             | 0.16    | 2688   | 2699.3 |
|                                                                              | C/A-A/A  | 516 (72.4%) | 1039 (75.2%)                     | 1.16 (0.95-1.42) |         |        |        |
| Recessive                                                                    | C/C-C/A  | 543 (76.2%) | 1030 (74.6%)                     | 1.00             | 0.43    | 2689.4 | 2700.7 |
|                                                                              | A/A      | 170 (23.8%) | 351 (25.4%)                      | 1.09 (0.88-1.34) |         |        |        |
| Overdominant                                                                 | C/C-A/A  | 367 (51.5%) | 693 (50.2%)                      | 1.00             | 0.58    | 2689.7 | 2701   |
|                                                                              | C/A      | 346 (48.5%) | 688 (49.8%)                      | 1.05 (0.88-1.26) |         |        |        |
| HTR2A rs6313 association with response Diagnosis (n=2053, crude analysis)    |          |             |                                  |                  |         |        |        |
| Model                                                                        | Genotype | Control     | Schizophrenia spectrum disorders | OR (95% CI)      | P-value | AIC    | BIC    |
| Codominant                                                                   | G/G      | 289 (38.8%) | 574 (43.9%)                      | 1.00             | 0.053   | 2689.8 | 2706.7 |
|                                                                              | G/A      | 345 (46.3%) | 572 (43.7%)                      | 0.83 (0.69-1.01) |         |        |        |
|                                                                              | A/A      | 111 (14.9%) | 162 (12.4%)                      | 0.73 (0.56-0.97) |         |        |        |
| Dominant                                                                     | G/G      | 289 (38.8%) | 574 (43.9%)                      | 1.00             | 0.024   | 2688.6 | 2699.9 |
|                                                                              | G/A-A/A  | 456 (61.2%) | 734 (56.1%)                      | 0.81 (0.67-0.97) |         |        |        |
| Recessive                                                                    | G/G-G/A  | 634 (85.1%) | 1146 (87.6%)                     | 1.00             | 0.11    | 2691.1 | 2702.4 |
|                                                                              | A/A      | 111 (14.9%) | 162 (12.4%)                      | 0.81 (0.62-1.05) |         |        |        |
| Overdominant                                                                 | G/G-A/A  | 400 (53.7%) | 736 (56.3%)                      | 1.00             | 0.26    | 2692.4 | 2703.7 |
|                                                                              | G/A      | 345 (46.3%) | 572 (43.7%)                      | 0.90 (0.75-1.08) |         |        |        |
| DRD4 rs1800955 association with response Diagnosis (n=2068, crude analysis)  |          |             |                                  |                  |         |        |        |
| Model                                                                        | Genotype | Control     | Schizophrenia spectrum disorders | OR (95% CI)      | P-value | AIC    | BIC    |
| Codominant                                                                   | T/T      | 238 (34%)   | 381 (27.8%)                      | 1.00             | 0.0059  | 2641.5 | 2658.4 |
|                                                                              | T/C      | 328 (46.9%) | 668 (48.8%)                      | 1.27 (1.03-1.57) |         |        |        |
|                                                                              | C/C      | 133 (19%)   | 320 (23.4%)                      | 1.50 (1.16-1.95) |         |        |        |
| Dominant                                                                     | T/T      | 238 (34%)   | 381 (27.8%)                      | 1.00             | 0.0037  | 2641.4 | 2652.7 |
|                                                                              | T/C-C/C  | 461 (66%)   | 988 (72.2%)                      | 1.34 (1.10-1.63) |         |        |        |
| Recessive                                                                    | T/T-T/C  | 566 (81%)   | 1049 (76.6%)                     | 1.00             | 0.023   | 2644.6 | 2655.9 |
|                                                                              | C/C      | 133 (19%)   | 320 (23.4%)                      | 1.30 (1.03-1.63) |         |        |        |
| Overdominant                                                                 | T/T-C/C  | 371 (53.1%) | 701 (51.2%)                      | 1.00             | 0.42    | 2649.2 | 2660.4 |
|                                                                              | T/C      | 328 (46.9%) | 668 (48.8%)                      | 1.08 (0.90-1.29) |         |        |        |

AIC - Akaike information criterion; BIC - Bayesian information criterion; OR - Odds ratio; P-value < 0.05 was considered as significance;

**Table S4:** Analysis of the association of allele frequency with the study groups (Mood disorders to Schizophrenia spectrum disorders).

| BDNF rs6265 association with response Diagnosis (n=1618, crude analysis)     |          |                |                                  |                  |         |        |        |
|------------------------------------------------------------------------------|----------|----------------|----------------------------------|------------------|---------|--------|--------|
| Model                                                                        | Genotype | Mood Disorders | Schizophrenia spectrum disorders | OR (95% CI)      | P-value | AIC    | BIC    |
| Codominant                                                                   | C/C      | 159 (73.6%)    | 1054 (75.2%)                     | 1.00             | 0.66    | 1276.9 | 1293   |
|                                                                              | C/T      | 51 (23.6%)     | 322 (23%)                        | 0.95 (0.68-1.34) |         |        |        |
|                                                                              | T/T      | 6 (2.8%)       | 26 (1.8%)                        | 0.65 (0.26-1.61) |         |        |        |
| Dominant                                                                     | C/C      | 159 (73.6%)    | 1054 (75.2%)                     | 1.00             | 0.62    | 1275.4 | 1286.2 |
|                                                                              | C/T–T/T  | 57 (26.4%)     | 348 (24.8%)                      | 0.92 (0.66-1.28) |         |        |        |
| Recessive                                                                    | C/C–C/T  | 210 (97.2%)    | 1376 (98.2%)                     | 1.00             | 0.39    | 1274.9 | 1285.7 |
|                                                                              | T/T      | 6 (2.8%)       | 26 (1.8%)                        | 0.66 (0.27-1.63) |         |        |        |
| Overdominant                                                                 | C/C-T/T  | 165 (76.4%)    | 1080 (77%)                       | 1.00             | 0.83    | 1275.6 | 1286.4 |
|                                                                              | C/T      | 51 (23.6%)     | 322 (23%)                        | 0.96 (0.69-1.35) |         |        |        |
| BDNF rs10835210 association with response Diagnosis (n=1598, crude analysis) |          |                |                                  |                  |         |        |        |
| Model                                                                        | Genotype | Mood Disorders | Schizophrenia spectrum disorders | OR (95% CI)      | P-value | AIC    | BIC    |
| Codominant                                                                   | A/A      | 67 (30.9%)     | 351 (25.4%)                      | 1.00             | 0.24    | 1272.8 | 1288.9 |
|                                                                              | C/A      | 101 (46.5%)    | 688 (49.8%)                      | 1.30 (0.93-1.82) |         |        |        |
|                                                                              | C/C      | 49 (22.6%)     | 342 (24.8%)                      | 1.33 (0.90-1.98) |         |        |        |
| Dominant                                                                     | A/A      | 67 (30.9%)     | 351 (25.4%)                      | 1.00             | 0.094   | 1270.8 | 1281.6 |
|                                                                              | C/A-C/C  | 150 (69.1%)    | 1030 (74.6%)                     | 1.31 (0.96-1.79) |         |        |        |
| Recessive                                                                    | A/A-C/A  | 168 (77.4%)    | 1039 (75.2%)                     | 1.00             | 0.48    | 1273.1 | 1283.9 |
|                                                                              | C/C      | 49 (22.6%)     | 342 (24.8%)                      | 1.13 (0.80-1.59) |         |        |        |
| Overdominant                                                                 | A/A-C/C  | 116 (53.5%)    | 693 (50.2%)                      | 1.00             | 0.37    | 1272.8 | 1283.6 |
|                                                                              | C/A      | 101 (46.5%)    | 688 (49.8%)                      | 1.14 (0.86-1.52) |         |        |        |
| HTR2A rs6313 association with response Diagnosis (n=1512, crude analysis)    |          |                |                                  |                  |         |        |        |
| Model                                                                        | Genotype | Mood Disorders | Schizophrenia spectrum disorders | OR (95% CI)      | P-value | AIC    | BIC    |
| Codominant                                                                   | G/G      | 78 (38.2%)     | 574 (43.9%)                      | 1.00             | 0.12    | 1198.1 | 1214.1 |
|                                                                              | G/A      | 105 (51.5%)    | 572 (43.7%)                      | 0.74 (0.54-1.01) |         |        |        |
|                                                                              | A/A      | 21 (10.3%)     | 162 (12.4%)                      | 1.05 (0.63-1.75) |         |        |        |
| Dominant                                                                     | G/G      | 78 (38.2%)     | 574 (43.9%)                      | 1.00             | 0.13    | 1198.1 | 1208.7 |
|                                                                              | G/A-A/A  | 126 (61.8%)    | 734 (56.1%)                      | 0.79 (0.58-1.07) |         |        |        |
| Recessive                                                                    | G/G-G/A  | 183 (89.7%)    | 1146 (87.6%)                     | 1.00             | 0.39    | 1199.6 | 1210.3 |
|                                                                              | A/A      | 21 (10.3%)     | 162 (12.4%)                      | 1.23 (0.76-1.99) |         |        |        |
| Overdominant                                                                 | G/G-A/A  | 99 (48.5%)     | 736 (56.3%)                      | 1.00             | 0.039   | 1196.1 | 1206.8 |
|                                                                              | G/A      | 105 (51.5%)    | 572 (43.7%)                      | 0.73 (0.55-0.98) |         |        |        |
| DRD4 rs1800955 association with response Diagnosis (n=1579, crude analysis)  |          |                |                                  |                  |         |        |        |
| Model                                                                        | Genotype | Mood Disorders | Schizophrenia spectrum disorders | OR (95% CI)      | P-value | AIC    | BIC    |
| Codominant                                                                   | T/T      | 51 (24.3%)     | 381 (27.8%)                      | 1.00             | 0.27    | 1241.5 | 1257.6 |
|                                                                              | T/C      | 115 (54.8%)    | 668 (48.8%)                      | 0.78 (0.55-1.11) |         |        |        |
|                                                                              | C/C      | 44 (20.9%)     | 320 (23.4%)                      | 0.97 (0.63-1.50) |         |        |        |
| Dominant                                                                     | T/T      | 51 (24.3%)     | 381 (27.8%)                      | 1.00             | 0.28    | 1240.9 | 1251.6 |
|                                                                              | T/C-C/C  | 159 (75.7%)    | 988 (72.2%)                      | 0.83 (0.59-1.16) |         |        |        |
| Recessive                                                                    | T/T-T/C  | 166 (79%)      | 1049 (76.6%)                     | 1.00             | 0.43    | 1241.5 | 1252.2 |
|                                                                              | C/C      | 44 (20.9%)     | 320 (23.4%)                      | 1.15 (0.81-1.64) |         |        |        |
| Overdominant                                                                 | T/T-C/C  | 95 (45.2%)     | 701 (51.2%)                      | 1.00             | 0.11    | 1239.5 | 1250.2 |
|                                                                              | T/C      | 115 (54.8%)    | 668 (48.8%)                      | 0.79 (0.59-1.05) |         |        |        |

AIC - Akaike information criterion; BIC - Bayesian information criterion; OR - Odds ratio; P-value < 0.05 was considered as significance;

**Table S5:** Analysis of the association of allele frequency with the symptom cluster - hallucinations (symptoms observed / no symptoms observed).

| rs6268 association with response Hallucinations (n=1766, crude analysis)     |          |             |             |                  |         |        |        |
|------------------------------------------------------------------------------|----------|-------------|-------------|------------------|---------|--------|--------|
| Model                                                                        | Genotype | No          | Yes         | OR (95% CI)      | P-value | AIC    | BIC    |
| Codominant                                                                   | C/C      | 430 (73%)   | 804 (75.1%) | 1.00             | 0.39    | 2163.4 | 2179.6 |
|                                                                              | C/T      | 150 (25.5%) | 245 (22.9%) | 0.87 (0.69-1.10) |         |        |        |
|                                                                              | T/T      | 9 (1.5%)    | 22 (2%)     | 1.31 (0.60-2.86) |         |        |        |
| Dominant                                                                     | C/C      | 430 (73%)   | 804 (75.1%) | 1.00             | 0.36    | 2162.4 | 2173.2 |
|                                                                              | C/T–T/T  | 159 (27%)   | 267 (24.9%) | 0.90 (0.71-1.13) |         |        |        |
| Recessive                                                                    | C/C–C/T  | 580 (98.5%) | 1049 (98%)  | 1.00             | 0.44    | 2162.7 | 2173.5 |
|                                                                              | T/T      | 9 (1.5%)    | 22 (2%)     | 1.35 (0.62-2.95) |         |        |        |
| Overdominant                                                                 | C/C-T/T  | 439 (74.5%) | 826 (77.1%) | 1.00             | 0.24    | 2161.9 | 2172.7 |
|                                                                              | C/T      | 150 (25.5%) | 245 (22.9%) | 0.87 (0.69-1.10) |         |        |        |
| rs10835210 association with response Hallucinations (n=1746, crude analysis) |          |             |             |                  |         |        |        |
| Model                                                                        | Genotype | No          | Yes         | OR (95% CI)      | P-value | AIC    | BIC    |
| Codominant                                                                   | A/A      | 158 (27.1%) | 256 (24.2%) | 1.00             | 0.22    | 2138.7 | 2154.9 |
|                                                                              | C/A      | 294 (50.3%) | 525 (49.7%) | 1.10 (0.86-1.41) |         |        |        |
|                                                                              | C/C      | 132 (22.6%) | 275 (26%)   | 1.29 (0.96-1.71) |         |        |        |
| Dominant                                                                     | A/A      | 158 (27.1%) | 256 (24.2%) | 1.00             | 0.21    | 2138.2 | 2149   |
|                                                                              | C/A-C/C  | 426 (73%)   | 800 (75.8%) | 1.16 (0.92-1.46) |         |        |        |
| Recessive                                                                    | A/A-C/A  | 452 (77.4%) | 781 (74%)   | 1.00             | 0.12    | 2137.3 | 2148.1 |
|                                                                              | C/C      | 132 (22.6%) | 275 (26%)   | 1.21 (0.95-1.53) |         |        |        |
| Overdominant                                                                 | A/A-C/C  | 290 (49.7%) | 531 (50.3%) | 1.00             | 0.81    | 2139.7 | 2150.5 |
|                                                                              | C/A      | 294 (50.3%) | 525 (49.7%) | 0.98 (0.80-1.19) |         |        |        |
| rs6313 association with response Hallucinations (n=1651, crude analysis)     |          |             |             |                  |         |        |        |
| Model                                                                        | Genotype | No          | Yes         | OR (95% CI)      | P-value | AIC    | BIC    |
| Codominant                                                                   | G/G      | 236 (42.6%) | 434 (43.5%) | 1.00             | 0.82    | 2028.3 | 2044.4 |
|                                                                              | G/A      | 253 (45.7%) | 440 (44.1%) | 0.95 (0.76-1.18) |         |        |        |
|                                                                              | A/A      | 65 (11.7%)  | 124 (12.4%) | 1.04 (0.74-1.46) |         |        |        |
| Dominant                                                                     | G/G      | 236 (42.6%) | 434 (43.5%) | 1.00             | 0.74    | 2026.6 | 2037.3 |
|                                                                              | G/A-A/A  | 318 (57.4%) | 564 (56.5%) | 0.96 (0.78-1.19) |         |        |        |
| Recessive                                                                    | G/G-G/A  | 489 (88.3%) | 874 (87.6%) | 1.00             | 0.69    | 2026.6 | 2037.3 |
|                                                                              | A/A      | 65 (11.7%)  | 124 (12.4%) | 1.07 (0.78-1.47) |         |        |        |
| Overdominant                                                                 | G/G-A/A  | 301 (54.3%) | 558 (55.9%) | 1.00             | 0.55    | 2026.4 | 2037.1 |
|                                                                              | G/A      | 253 (45.7%) | 440 (44.1%) | 0.94 (0.76-1.16) |         |        |        |
| rs1800955 association with response Hallucinations (n=1729, crude analysis)  |          |             |             |                  |         |        |        |
| Model                                                                        | Genotype | No          | Yes         | OR (95% CI)      | P-value | AIC    | BIC    |
| Codominant                                                                   | T/T      | 164 (28.2%) | 280 (26.7%) | 1.00             | 0.082   | 2127.3 | 2143.5 |
|                                                                              | T/C      | 303 (52.1%) | 512 (48.8%) | 0.99 (0.78-1.26) |         |        |        |
|                                                                              | C/C      | 115 (19.8%) | 258 (24.6%) | 1.31 (0.98-1.76) |         |        |        |
| Dominant                                                                     | T/T      | 164 (28.2%) | 280 (26.7%) | 1.00             | 0.51    | 2129.9 | 2140.7 |
|                                                                              | T/C-C/C  | 418 (71.8%) | 770 (73.3%) | 1.08 (0.86-1.35) |         |        |        |
| Recessive                                                                    | T/T-T/C  | 467 (80.2%) | 792 (75.4%) | 1.00             | 0.025   | 2125.3 | 2136.1 |
|                                                                              | C/C      | 115 (19.8%) | 258 (24.6%) | 1.32 (1.03-1.69) |         |        |        |
| Overdominant                                                                 | T/T-C/C  | 279 (47.9%) | 538 (51.2%) | 1.00             | 0.2     | 2128.7 | 2139.5 |
|                                                                              | T/C      | 303 (52.1%) | 512 (48.8%) | 0.88 (0.72-1.07) |         |        |        |

AIC - Akaike information criterion; BIC - Bayesian information criterion; OR - Odds ratio; P-value < 0.05 was considered as significance; Yes - symptoms observed; No - no symptoms observed;

**Table S6:** Analysis of the association of allele frequency with the symptom cluster - deulsions of control (symptoms observed / no symptoms observed).

| rs6268 association with response Deulsions of control (n=1766, crude analysis)     |          |              |             |                  |         |            |            |
|------------------------------------------------------------------------------------|----------|--------------|-------------|------------------|---------|------------|------------|
| Model                                                                              | Genotype | No           | Yes         | OR (95% CI)      | P-value | AIC        | BIC        |
| Codomina<br>nt                                                                     | C/C      | 771 (74.8%)  | 308 (72.5%) | 1.00             | 0.55    | 1762.<br>5 | 1778.<br>4 |
|                                                                                    | C/T      | 242 (23.5%)  | 111 (26.1%) | 1.15 (0.88-1.49) |         |            |            |
|                                                                                    | T/T      | 17 (1.6%)    | 6 (1.4%)    | 0.88 (0.35-2.26) |         |            |            |
| Dominant                                                                           | C/C      | 771 (74.8%)  | 308 (72.5%) | 1.00             | 0.35    | 1760.<br>8 | 1771.<br>4 |
|                                                                                    | C/T–T/T  | 259 (25.1%)  | 117 (27.5%) | 1.13 (0.88-1.46) |         |            |            |
| Recessive                                                                          | C/C–C/T  | 1013 (98.3%) | 419 (98.6%) | 1.00             | 0.74    | 1761.<br>6 | 1772.<br>1 |
|                                                                                    | T/T      | 17 (1.6%)    | 6 (1.4%)    | 0.85 (0.33-2.18) |         |            |            |
| Overdomin<br>ant                                                                   | C/C-T/T  | 788 (76.5%)  | 314 (73.9%) | 1.00             | 0.29    | 1760.<br>6 | 1771.<br>1 |
|                                                                                    | C/T      | 242 (23.5%)  | 111 (26.1%) | 1.15 (0.89-1.49) |         |            |            |
| rs10835210 association with response Deulsions of control (n=1746, crude analysis) |          |              |             |                  |         |            |            |
| Model                                                                              | Genotype | No           | Yes         | OR (95% CI)      | P-value | AIC        | BIC        |
| Codomina<br>nt                                                                     | A/A      | 274 (26.9%)  | 94 (22.4%)  | 1.00             | 0.12    | 1738.<br>8 | 1754.<br>6 |
|                                                                                    | C/A      | 503 (49.4%)  | 210 (50%)   | 1.22 (0.92-1.62) |         |            |            |
|                                                                                    | C/C      | 241 (23.7%)  | 116 (27.6%) | 1.40 (1.02-1.94) |         |            |            |
| Dominant                                                                           | A/A      | 274 (26.9%)  | 94 (22.4%)  | 1.00             | 0.071   | 1737.<br>8 | 1748.<br>4 |
|                                                                                    | C/A-C/C  | 744 (73.1%)  | 326 (77.6%) | 1.28 (0.98-1.67) |         |            |            |
| Recessive                                                                          | A/A-C/A  | 777 (76.3%)  | 304 (72.4%) | 1.00             | 0.12    | 1738.<br>6 | 1749.<br>2 |
|                                                                                    | C/C      | 241 (23.7%)  | 116 (27.6%) | 1.23 (0.95-1.59) |         |            |            |
| Overdomin<br>ant                                                                   | A/A-C/C  | 515 (50.6%)  | 210 (50%)   | 1.00             | 0.84    | 1741.<br>1 | 1751.<br>6 |
|                                                                                    | C/A      | 503 (49.4%)  | 210 (50%)   | 1.02 (0.82-1.29) |         |            |            |
| rs6313 association with response Deulsions of control (n=1651, crude analysis)     |          |              |             |                  |         |            |            |
| Model                                                                              | Genotype | No           | Yes         | OR (95% CI)      | P-value | AIC        | BIC        |
| Codomina<br>nt                                                                     | G/G      | 417 (43.3%)  | 172 (43.1%) | 1.00             | 0.082   | 1648.<br>4 | 1664       |
|                                                                                    | G/A      | 446 (46.3%)  | 169 (42.4%) | 0.92 (0.71-1.18) |         |            |            |
|                                                                                    | A/A      | 100 (10.4%)  | 58 (14.5%)  | 1.41 (0.97-2.03) |         |            |            |
| Dominant                                                                           | G/G      | 417 (43.3%)  | 172 (43.1%) | 1.00             | 0.95    | 1651.<br>4 | 1661.<br>8 |
|                                                                                    | G/A-A/A  | 546 (56.7%)  | 227 (56.9%) | 1.01 (0.80-1.28) |         |            |            |
| Recessive                                                                          | G/G-G/A  | 863 (89.6%)  | 341 (85.5%) | 1.00             | 0.033   | 1646.<br>8 | 1657.<br>3 |
|                                                                                    | A/A      | 100 (10.4%)  | 58 (14.5%)  | 1.47 (1.04-2.08) |         |            |            |
| Overdomin<br>ant                                                                   | G/G-A/A  | 517 (53.7%)  | 230 (57.6%) | 1.00             | 0.18    | 1649.<br>6 | 1660       |
|                                                                                    | G/A      | 446 (46.3%)  | 169 (42.4%) | 0.85 (0.67-1.08) |         |            |            |
| rs1800955 association with response Deulsions of control (n=1729, crude analysis)  |          |              |             |                  |         |            |            |
| Model                                                                              | Genotype | No           | Yes         | OR (95% CI)      | P-value | AIC        | BIC        |
| Codominant                                                                         | T/T      | 296 (29.3%)  | 99 (23.4%)  | 1.00             | 0.031   | 1738.<br>6 | 1754.<br>4 |
|                                                                                    | T/C      | 497 (49.2%)  | 212 (50.1%) | 1.28 (0.97-1.69) |         |            |            |
|                                                                                    | C/C      | 218 (21.6%)  | 112 (26.5%) | 1.54 (1.11-2.12) |         |            |            |
| Dominant                                                                           | T/T      | 296 (29.3%)  | 99 (23.4%)  | 1.00             | 0.022   | 1738.<br>3 | 1748.<br>9 |
|                                                                                    | T/C-C/C  | 715 (70.7%)  | 324 (76.6%) | 1.35 (1.04-1.76) |         |            |            |
| Recessive                                                                          | T/T-T/C  | 793 (78.4%)  | 311 (73.5%) | 1.00             | 0.046   | 1739.<br>6 | 1750.<br>1 |
|                                                                                    | C/C      | 218 (21.6%)  | 112 (26.5%) | 1.31 (1.01-1.70) |         |            |            |
| Overdomina<br>nt                                                                   | T/T-C/C  | 514 (50.8%)  | 211 (49.9%) | 1.00             | 0.74    | 1743.<br>5 | 1754       |
|                                                                                    | T/C      | 497 (49.2%)  | 212 (50.1%) | 1.04 (0.83-1.30) |         |            |            |

AIC - Akaike information criterion; BIC - Bayesian information criterion; OR - Odds ratio; P-value < 0.05 was considered as significance; Yes - symptoms observed; No - no symptoms observed;



**Table S7:** Analysis of the association of allele frequency with the symptom cluster - delusions (symptoms observed / no symptoms observed).

| rs6268 association with response Delusions (n=1766, crude analysis)     |          |             |              |                  |         |        |            |
|-------------------------------------------------------------------------|----------|-------------|--------------|------------------|---------|--------|------------|
| Model                                                                   | Genotype | No          | Yes          | OR (95% CI)      | P-value | AIC    | BIC        |
| Codom<br>inant                                                          | C/C      | 343 (75.4%) | 845 (74.2%)  | 1.00             | 0.8     | 1912.1 | 1928.<br>2 |
|                                                                         | C/T      | 105 (23.1%) | 272 (23.9%)  | 1.05 (0.81-1.36) |         |        |            |
|                                                                         | T/T      | 7 (1.5%)    | 22 (1.9%)    | 1.28 (0.54-3.01) |         |        |            |
| Domin<br>ant                                                            | C/C      | 343 (75.4%) | 845 (74.2%)  | 1.00             | 0.62    | 1910.3 | 1921       |
|                                                                         | C/T–T/T  | 112 (24.6%) | 294 (25.8%)  | 1.07 (0.83-1.37) |         |        |            |
| Recessi<br>ve                                                           | C/C–C/T  | 448 (98.5%) | 1117 (98.1%) | 1.00             | 0.59    | 1910.2 | 1921       |
|                                                                         | T/T      | 7 (1.5%)    | 22 (1.9%)    | 1.26 (0.53-2.97) |         |        |            |
| Overdo<br>minant                                                        | C/C-T/T  | 350 (76.9%) | 867 (76.1%)  | 1.00             | 0.73    | 1910.4 | 1921.<br>1 |
|                                                                         | C/T      | 105 (23.1%) | 272 (23.9%)  | 1.05 (0.81-1.35) |         |        |            |
| rs10835210 association with response Delusions (n=1746, crude analysis) |          |             |              |                  |         |        |            |
| Model                                                                   | Genotype | No          | Yes          | OR (95% CI)      | P-value | AIC    | BIC        |
| Codom<br>inant                                                          | A/A      | 109 (24.2%) | 293 (26%)    | 1.00             | 0.73    | 1889.9 | 1906       |
|                                                                         | C/A      | 231 (51.3%) | 557 (49.5%)  | 0.90 (0.69-1.17) |         |        |            |
|                                                                         | C/C      | 110 (24.4%) | 275 (24.4%)  | 0.93 (0.68-1.27) |         |        |            |
| Domin<br>ant                                                            | A/A      | 109 (24.2%) | 293 (26%)    | 1.00             | 0.45    | 1888   | 1898.<br>7 |
|                                                                         | C/A-C/C  | 341 (75.8%) | 832 (74%)    | 0.91 (0.70-1.17) |         |        |            |
| Recessi<br>ve                                                           | A/A-C/A  | 340 (75.6%) | 850 (75.6%)  | 1.00             | 1       | 1888.5 | 1899.<br>3 |
|                                                                         | C/C      | 110 (24.4%) | 275 (24.4%)  | 1.00 (0.78-1.29) |         |        |            |
| Overdo<br>minant                                                        | A/A-C/C  | 219 (48.7%) | 568 (50.5%)  | 1.00             | 0.51    | 1888.1 | 1898.<br>8 |
|                                                                         | C/A      | 231 (51.3%) | 557 (49.5%)  | 0.93 (0.75-1.16) |         |        |            |
| rs6313 association with response Delusions (n=1651, crude analysis)     |          |             |              |                  |         |        |            |
| Model                                                                   | Genotype | No          | Yes          | OR (95% CI)      | P-value | AIC    | BIC        |
| Codom<br>inant                                                          | G/G      | 178 (41.9%) | 456 (42.8%)  | 1.00             | 0.31    | 1785.2 | 1801.<br>1 |
|                                                                         | G/A      | 202 (47.5%) | 470 (44.1%)  | 0.91 (0.72-1.15) |         |        |            |
|                                                                         | A/A      | 45 (10.6%)  | 139 (13.1%)  | 1.21 (0.83-1.76) |         |        |            |
| Domin<br>ant                                                            | G/G      | 178 (41.9%) | 456 (42.8%)  | 1.00             | 0.74    | 1785.4 | 1796       |
|                                                                         | G/A-A/A  | 247 (58.1%) | 609 (57.2%)  | 0.96 (0.77-1.21) |         |        |            |
| Recessi<br>ve                                                           | G/G-G/A  | 380 (89.4%) | 926 (87%)    | 1.00             | 0.19    | 1783.8 | 1794.<br>4 |
|                                                                         | A/A      | 45 (10.6%)  | 139 (13.1%)  | 1.27 (0.89-1.81) |         |        |            |
| Overdo<br>minant                                                        | G/G-A/A  | 223 (52.5%) | 595 (55.9%)  | 1.00             | 0.23    | 1784.1 | 1794.<br>7 |
|                                                                         | G/A      | 202 (47.5%) | 470 (44.1%)  | 0.87 (0.70-1.09) |         |        |            |
| rs1800955 association with response Delusions (n=1729, crude analysis)  |          |             |              |                  |         |        |            |
| Model                                                                   | Genotype | No          | Yes          | OR (95% CI)      | P-value | AIC    | BIC        |
| Codo<br>minant                                                          | T/T      | 113 (25.4%) | 322 (28.8%)  | 1.00             | 0.037   | 1867.4 | 1883<br>.4 |
|                                                                         | T/C      | 243 (54.6%) | 531 (47.5%)  | 0.77 (0.59-1.00) |         |        |            |
|                                                                         | C/C      | 89 (20%)    | 266 (23.8%)  | 1.05 (0.76-1.45) |         |        |            |
| Domin<br>ant                                                            | T/T      | 113 (25.4%) | 322 (28.8%)  | 1.00             | 0.18    | 1870.1 | 1880<br>.8 |
|                                                                         | T/C-C/C  | 332 (74.6%) | 797 (71.2%)  | 0.84 (0.66-1.08) |         |        |            |
| Recess<br>ive                                                           | T/T-T/C  | 356 (80%)   | 853 (76.2%)  | 1.00             | 0.1     | 1869.3 | 1880<br>.1 |
|                                                                         | C/C      | 89 (20%)    | 266 (23.8%)  | 1.25 (0.95-1.63) |         |        |            |
| Overd<br>omina<br>nt                                                    | T/T-C/C  | 202 (45.4%) | 588 (52.5%)  | 1.00             | 0.011   | 1865.4 | 1876<br>.2 |
|                                                                         | T/C      | 243 (54.6%) | 531 (47.5%)  | 0.75 (0.60-0.94) |         |        |            |

AIC - Akaike information criterion; BIC - Bayesian information criterion; OR - Odds ratio; P-value < 0.05 was considered as significance; Yes - symptoms observed; No - no symptoms observed;

**Table S8:** Analysis of the association of allele frequency with the symptom cluster - catatonic symptoms (symptoms observed / no symptoms observed).

| rs6268 association with response Catatonic symptoms (n=1766, crude analysis)     |          |              |             |                  |         |       |       |
|----------------------------------------------------------------------------------|----------|--------------|-------------|------------------|---------|-------|-------|
| Model                                                                            | Genotype | No           | Yes         | OR (95% CI)      | P-value | AI C  | BIC   |
| Codominant                                                                       | C/C      | 1002 (74.5%) | 101 (78.3%) | 1.00             | 0.26    | 878.1 | 894   |
|                                                                                  | C/T      | 320 (23.8%)  | 24 (18.6%)  | 0.74 (0.47-1.18) |         |       |       |
|                                                                                  | T/T      | 23 (1.7%)    | 4 (3.1%)    | 1.73 (0.59-5.09) |         |       |       |
| Dominant                                                                         | C/C      | 1002 (74.5%) | 101 (78.3%) | 1.00             | 0.34    | 877.9 | 888.5 |
|                                                                                  | C/T-T/T  | 343 (25.5%)  | 28 (21.7%)  | 0.81 (0.52-1.25) |         |       |       |
| Recessive                                                                        | C/C-C/T  | 1322 (98.3%) | 125 (96.9%) | 1.00             | 0.3     | 877.8 | 888.4 |
|                                                                                  | T/T      | 23 (1.7%)    | 4 (3.1%)    | 1.84 (0.63-5.40) |         |       |       |
| Overdominant                                                                     | C/C-T/T  | 1025 (76.2%) | 105 (81.4%) | 1.00             | 0.17    | 877   | 887.6 |
|                                                                                  | C/T      | 320 (23.8%)  | 24 (18.6%)  | 0.73 (0.46-1.16) |         |       |       |
| rs10835210 association with response Catatonic symptoms (n=1746, crude analysis) |          |              |             |                  |         |       |       |
| Model                                                                            | Genotype | No           | Yes         | OR (95% CI)      | P-value | AI C  | BIC   |
| Codominant                                                                       | A/A      | 349 (26.2%)  | 33 (26.2%)  | 1.00             | 0.55    | 862.4 | 878.3 |
|                                                                                  | C/A      | 653 (49.1%)  | 67 (53.2%)  | 1.09 (0.70-1.68) |         |       |       |
|                                                                                  | C/C      | 329 (24.7%)  | 26 (20.6%)  | 0.84 (0.49-1.43) |         |       |       |
| Dominant                                                                         | A/A      | 349 (26.2%)  | 33 (26.2%)  | 1.00             | 0.99    | 861.6 | 872.2 |
|                                                                                  | C/A-C/C  | 982 (73.8%)  | 93 (73.8%)  | 1.00 (0.66-1.52) |         |       |       |
| Recessive                                                                        | A/A-C/A  | 1002 (75.3%) | 100 (79.4%) | 1.00             | 0.3     | 860.6 | 871.1 |
|                                                                                  | C/C      | 329 (24.7%)  | 26 (20.6%)  | 0.79 (0.51-1.24) |         |       |       |
| Overdominant                                                                     | A/A-C/C  | 678 (50.9%)  | 59 (46.8%)  | 1.00             | 0.38    | 860.9 | 871.4 |
|                                                                                  | C/A      | 653 (49.1%)  | 67 (53.2%)  | 1.18 (0.82-1.70) |         |       |       |
| rs6313 association with response Catatonic symptoms (n=1651, crude analysis)     |          |              |             |                  |         |       |       |
| Model                                                                            | Genotype | No           | Yes         | OR (95% CI)      | P-value | AI C  | BIC   |
| Codominant                                                                       | G/G      | 543 (43.2%)  | 49 (39.5%)  | 1.00             | 0.44    | 838.5 | 854.1 |
|                                                                                  | G/A      | 568 (45.2%)  | 56 (45.2%)  | 1.09 (0.73-1.63) |         |       |       |
|                                                                                  | A/A      | 145 (11.5%)  | 19 (15.3%)  | 1.45 (0.83-2.54) |         |       |       |
| Dominant                                                                         | G/G      | 543 (43.2%)  | 49 (39.5%)  | 1.00             | 0.42    | 837.4 | 847.9 |
|                                                                                  | G/A-A/A  | 713 (56.8%)  | 75 (60.5%)  | 1.17 (0.80-1.70) |         |       |       |
| Recessive                                                                        | G/G-G/A  | 1111 (88.5%) | 105 (84.7%) | 1.00             | 0.23    | 836.6 | 847.1 |
|                                                                                  | A/A      | 145 (11.5%)  | 19 (15.3%)  | 1.39 (0.83-2.33) |         |       |       |
| Overdominant                                                                     | G/G-A/A  | 688 (54.8%)  | 68 (54.8%)  | 1.00             | 0.99    | 838.1 | 848.5 |
|                                                                                  | G/A      | 568 (45.2%)  | 56 (45.2%)  | 1.00 (0.69-1.45) |         |       |       |
| rs1800955 association with response Catatonic symptoms (n=1729, crude analysis)  |          |              |             |                  |         |       |       |
| Model                                                                            | Genotype | No           | Yes         | OR (95% CI)      | P-value | AI C  | BIC   |
| Codominant                                                                       | T/T      | 382 (28.9%)  | 27 (21.8%)  | 1.00             | 0.092   | 847.8 | 863.6 |
|                                                                                  | T/C      | 656 (49.5%)  | 61 (49.2%)  | 1.32 (0.82-2.11) |         |       |       |
|                                                                                  | C/C      | 286 (21.6%)  | 36 (29%)    | 1.78 (1.06-3.00) |         |       |       |
| Dominant                                                                         | T/T      | 382 (28.9%)  | 27 (21.8%)  | 1.00             | 0.086   | 847.6 | 858.2 |
|                                                                                  | T/C-C/C  | 942 (71.2%)  | 97 (78.2%)  | 1.46 (0.94-2.27) |         |       |       |
| Recessive                                                                        | T/T-T/C  | 1038 (78.4%) | 88 (71%)    | 1.00             | 0.064   | 847.1 | 857.7 |
|                                                                                  | C/C      | 286 (21.6%)  | 36 (29%)    | 1.48 (0.99-2.24) |         |       |       |
| Overdominant                                                                     | T/T-C/C  | 668 (50.5%)  | 63 (50.8%)  | 1.00             | 0.94    | 850.6 | 861.1 |
|                                                                                  | T/C      | 656 (49.5%)  | 61 (49.2%)  | 0.99 (0.68-1.42) |         |       |       |

AIC - Akaike information criterion; BIC - Bayesian information criterion; OR - Odds ratio; P-value < 0.05 was considered as significance; Yes - symptoms observed; No - no symptoms observed;



**Table S9:** Analysis of the association of allele frequency with the symptom cluster - neurotic, psychopathic symptoms, habit and impulse disorders (symptoms observed / no symptoms observed).

| rs6268 association with response Neurotic, psychopathic symptoms, habit and impulse disorders (n=1766, crude analysis)     |          |             |             |                  |         |        |        |
|----------------------------------------------------------------------------------------------------------------------------|----------|-------------|-------------|------------------|---------|--------|--------|
| Model                                                                                                                      | Genotype | No          | Yes         | OR (95% CI)      | P-value | AIC    | BIC    |
| Codominant                                                                                                                 | C/C      | 576 (75.4%) | 400 (74.9%) | 1.00             | 0.78    | 1763.9 | 1779.5 |
|                                                                                                                            | C/T      | 175 (22.9%) | 122 (22.9%) | 1.00 (0.77-1.31) |         |        |        |
|                                                                                                                            | T/T      | 13 (1.7%)   | 12 (2.2%)   | 1.33 (0.60-2.94) |         |        |        |
| Dominant                                                                                                                   | C/C      | 576 (75.4%) | 400 (74.9%) | 1.00             | 0.84    | 1762.4 | 1772.7 |
|                                                                                                                            | C/T-T/T  | 188 (24.6%) | 134 (25.1%) | 1.03 (0.79-1.33) |         |        |        |
| Recessive                                                                                                                  | C/C-C/T  | 751 (98.3%) | 522 (97.8%) | 1.00             | 0.48    | 1762   | 1772.3 |
|                                                                                                                            | T/T      | 13 (1.7%)   | 12 (2.2%)   | 1.33 (0.60-2.93) |         |        |        |
| Overdominant                                                                                                               | C/C-T/T  | 589 (77.1%) | 412 (77.2%) | 1.00             | 0.98    | 1762.4 | 1772.8 |
|                                                                                                                            | C/T      | 175 (22.9%) | 122 (22.9%) | 1.00 (0.77-1.30) |         |        |        |
| rs10835210 association with response Neurotic, psychopathic symptoms, habit and impulse disorders (n=1746, crude analysis) |          |             |             |                  |         |        |        |
| Model                                                                                                                      | Genotype | No          | Yes         | OR (95% CI)      | P-value | AIC    | BIC    |
| Codominant                                                                                                                 | A/A      | 215 (28.7%) | 121 (22.7%) | 1.00             | 0.025   | 1739.3 | 1754.8 |
|                                                                                                                            | C/A      | 360 (48.1%) | 262 (49.2%) | 1.29 (0.98-1.70) |         |        |        |
|                                                                                                                            | C/C      | 174 (23.2%) | 150 (28.1%) | 1.53 (1.12-2.09) |         |        |        |
| Dominant                                                                                                                   | A/A      | 215 (28.7%) | 121 (22.7%) | 1.00             | 0.016   | 1738.8 | 1749.1 |
|                                                                                                                            | C/A-C/C  | 534 (71.3%) | 412 (77.3%) | 1.37 (1.06-1.77) |         |        |        |
| Recessive                                                                                                                  | A/A-C/A  | 575 (76.8%) | 383 (71.9%) | 1.00             | 0.047   | 1740.7 | 1751   |
|                                                                                                                            | C/C      | 174 (23.2%) | 150 (28.1%) | 1.29 (1.00-1.67) |         |        |        |
| Overdominant                                                                                                               | A/A-C/C  | 389 (51.9%) | 271 (50.8%) | 1.00             | 0.7     | 1744.5 | 1754.8 |
|                                                                                                                            | C/A      | 360 (48.1%) | 262 (49.2%) | 1.04 (0.84-1.30) |         |        |        |
| rs6313 association with response Neurotic, psychopathic symptoms, habit and impulse disorders (n=1651, crude analysis)     |          |             |             |                  |         |        |        |
| Model                                                                                                                      | Genotype | No          | Yes         | OR (95% CI)      | P-value | AIC    | BIC    |
| Codominant                                                                                                                 | G/G      | 310 (43.1%) | 222 (44.3%) | 1.00             | 0.52    | 1657.9 | 1673.2 |
|                                                                                                                            | G/A      | 331 (46%)   | 216 (43.1%) | 0.91 (0.71-1.16) |         |        |        |
|                                                                                                                            | A/A      | 79 (11%)    | 63 (12.6%)  | 1.11 (0.77-1.62) |         |        |        |
| Dominant                                                                                                                   | G/G      | 310 (43.1%) | 222 (44.3%) | 1.00             | 0.66    | 1657   | 1667.2 |
|                                                                                                                            | G/A-A/A  | 410 (56.9%) | 279 (55.7%) | 0.95 (0.76-1.20) |         |        |        |
| Recessive                                                                                                                  | G/G-G/A  | 641 (89%)   | 438 (87.4%) | 1.00             | 0.39    | 1656.4 | 1666.7 |
|                                                                                                                            | A/A      | 79 (11%)    | 63 (12.6%)  | 1.17 (0.82-1.66) |         |        |        |
| Overdominant                                                                                                               | G/G-A/A  | 389 (54%)   | 285 (56.9%) | 1.00             | 0.32    | 1656.2 | 1666.4 |
|                                                                                                                            | G/A      | 331 (46%)   | 216 (43.1%) | 0.89 (0.71-1.12) |         |        |        |
| rs1800955 association with response Neurotic, psychopathic symptoms, habit and impulse disorders (n=1729, crude analysis)  |          |             |             |                  |         |        |        |
| Model                                                                                                                      | Genotype | No          | Yes         | OR (95% CI)      | P-value | AIC    | BIC    |
| Codominant                                                                                                                 | T/T      | 218 (28.9%) | 148 (28.2%) | 1.00             | 0.94    | 1737   | 1752.5 |
|                                                                                                                            | T/C      | 370 (49%)   | 262 (50%)   | 1.04 (0.80-1.36) |         |        |        |
|                                                                                                                            | C/C      | 167 (22.1%) | 114 (21.8%) | 1.01 (0.73-1.38) |         |        |        |
| Dominant                                                                                                                   | T/T      | 218 (28.9%) | 148 (28.2%) | 1.00             | 0.81    | 1735.1 | 1745.4 |
|                                                                                                                            | T/C-C/C  | 537 (71.1%) | 376 (71.8%) | 1.03 (0.81-1.32) |         |        |        |
| Recessive                                                                                                                  | T/T-T/C  | 588 (77.9%) | 410 (78.2%) | 1.00             | 0.88    | 1735.1 | 1745.4 |
|                                                                                                                            | C/C      | 167 (22.1%) | 114 (21.8%) | 0.98 (0.75-1.28) |         |        |        |
| Overdominant                                                                                                               | T/T-C/C  | 385 (51%)   | 262 (50%)   | 1.00             | 0.73    | 1735   | 1745.3 |
|                                                                                                                            | T/C      | 370 (49%)   | 262 (50%)   | 1.04 (0.83-1.30) |         |        |        |

AIC - Akaike information criterion; BIC - Bayesian information criterion; OR - Odds ratio; P-value < 0.05 was considered as significance; Yes - symptoms observed; No - no symptoms observed;

**Table S10:** Analysis of the association of allele frequency with the symptom cluster - suicidal and auto-aggressive behavior (symptoms observed / no symptoms observed).

| rs6268 association with response Suicidal and auto-aggressive behavior (n=1766, crude analysis)     |          |              |             |                  |         |        |        |
|-----------------------------------------------------------------------------------------------------|----------|--------------|-------------|------------------|---------|--------|--------|
| Model                                                                                               | Genotype | No           | Yes         | OR (95% CI)      | P-value | AIC    | BIC    |
| Codominant                                                                                          | C/C      | 833 (76.1%)  | 199 (72.9%) | 1.00             | 0.04    | 1367   | 1382.7 |
|                                                                                                     | C/T      | 246 (22.5%)  | 63 (23.1%)  | 1.07 (0.78-1.47) |         |        |        |
|                                                                                                     | T/T      | 16 (1.5%)    | 11 (4%)     | 2.88 (1.32-6.30) |         |        |        |
| Dominant                                                                                            | C/C      | 833 (76.1%)  | 199 (72.9%) | 1.00             | 0.28    | 1370.3 | 1380.7 |
|                                                                                                     | C/T–T/T  | 262 (23.9%)  | 74 (27.1%)  | 1.18 (0.88-1.60) |         |        |        |
| Recessive                                                                                           | C/C–C/T  | 1079 (98.5%) | 262 (96%)   | 1.00             | 0.013   | 1365.2 | 1375.6 |
|                                                                                                     | T/T      | 16 (1.5%)    | 11 (4%)     | 2.83 (1.30-6.17) |         |        |        |
| Overdominant                                                                                        | C/C-T/T  | 849 (77.5%)  | 210 (76.9%) | 1.00             | 0.83    | 1371.4 | 1381.8 |
|                                                                                                     | C/T      | 246 (22.5%)  | 63 (23.1%)  | 1.04 (0.76-1.42) |         |        |        |
| rs10835210 association with response Suicidal and auto-aggressive behavior (n=1746, crude analysis) |          |              |             |                  |         |        |        |
| Model                                                                                               | Genotype | No           | Yes         | OR (95% CI)      | P-value | AIC    | BIC    |
| Codominant                                                                                          | A/A      | 288 (26.7%)  | 74 (27.2%)  | 1.00             | 0.94    | 1363.4 | 1379   |
|                                                                                                     | C/A      | 519 (48.1%)  | 132 (48.5%) | 0.99 (0.72-1.36) |         |        |        |
|                                                                                                     | C/C      | 273 (25.3%)  | 66 (24.3%)  | 0.94 (0.65-1.36) |         |        |        |
| Dominant                                                                                            | A/A      | 288 (26.7%)  | 74 (27.2%)  | 1.00             | 0.86    | 1361.5 | 1371.9 |
|                                                                                                     | C/A-C/C  | 792 (73.3%)  | 198 (72.8%) | 0.97 (0.72-1.31) |         |        |        |
| Recessive                                                                                           | A/A-C/A  | 807 (74.7%)  | 206 (75.7%) | 1.00             | 0.73    | 1361.4 | 1371.8 |
|                                                                                                     | C/C      | 273 (25.3%)  | 66 (24.3%)  | 0.95 (0.70-1.29) |         |        |        |
| Overdominant                                                                                        | A/A-C/C  | 561 (51.9%)  | 140 (51.5%) | 1.00             | 0.89    | 1361.5 | 1371.9 |
|                                                                                                     | C/A      | 519 (48.1%)  | 132 (48.5%) | 1.02 (0.78-1.33) |         |        |        |
| rs6313 association with response Suicidal and auto-aggressive behavior (n=1651, crude analysis)     |          |              |             |                  |         |        |        |
| Model                                                                                               | Genotype | No           | Yes         | OR (95% CI)      | P-value | AIC    | BIC    |
| Codominant                                                                                          | G/G      | 447 (43.8%)  | 108 (40.9%) | 1.00             | 0.55    | 1310   | 1325.5 |
|                                                                                                     | G/A      | 460 (45%)    | 121 (45.8%) | 1.09 (0.81-1.46) |         |        |        |
|                                                                                                     | A/A      | 114 (11.2%)  | 35 (13.3%)  | 1.27 (0.82-1.96) |         |        |        |
| Dominant                                                                                            | G/G      | 447 (43.8%)  | 108 (40.9%) | 1.00             | 0.4     | 1308.5 | 1318.8 |
|                                                                                                     | G/A-A/A  | 574 (56.2%)  | 156 (59.1%) | 1.12 (0.85-1.48) |         |        |        |
| Recessive                                                                                           | G/G-G/A  | 907 (88.8%)  | 229 (86.7%) | 1.00             | 0.35    | 1308.3 | 1318.7 |
|                                                                                                     | A/A      | 114 (11.2%)  | 35 (13.3%)  | 1.22 (0.81-1.82) |         |        |        |
| Overdominant                                                                                        | G/G-A/A  | 561 (55%)    | 143 (54.2%) | 1.00             | 0.82    | 1309.2 | 1319.5 |
|                                                                                                     | G/A      | 460 (45%)    | 121 (45.8%) | 1.03 (0.79-1.35) |         |        |        |
| rs1800955 association with response Suicidal and auto-aggressive behavior (n=1729, crude analysis)  |          |              |             |                  |         |        |        |
| Model                                                                                               | Genotype | No           | Yes         | OR (95% CI)      | P-value | AIC    | BIC    |
| Codominant                                                                                          | T/T      | 311 (28.9%)  | 67 (24.5%)  | 1.00             | 0.22    | 1361.5 | 1377.1 |
|                                                                                                     | T/C      | 534 (49.7%)  | 137 (50.2%) | 1.19 (0.86-1.65) |         |        |        |
|                                                                                                     | C/C      | 230 (21.4%)  | 69 (25.3%)  | 1.39 (0.96-2.03) |         |        |        |
| Dominant                                                                                            | T/T      | 311 (28.9%)  | 67 (24.5%)  | 1.00             | 0.15    | 1360.3 | 1370.8 |
|                                                                                                     | T/C-C/C  | 764 (71.1%)  | 206 (75.5%) | 1.25 (0.92-1.70) |         |        |        |
| Recessive                                                                                           | T/T-T/C  | 845 (78.6%)  | 204 (74.7%) | 1.00             | 0.17    | 1360.6 | 1371   |
|                                                                                                     | C/C      | 230 (21.4%)  | 69 (25.3%)  | 1.24 (0.91-1.69) |         |        |        |
| Overdominant                                                                                        | T/T-C/C  | 541 (50.3%)  | 136 (49.8%) | 1.00             | 0.88    | 1362.4 | 1372.8 |
|                                                                                                     | T/C      | 534 (49.7%)  | 137 (50.2%) | 1.02 (0.78-1.33) |         |        |        |

AIC - Akaike information criterion; BIC - Bayesian information criterion; OR - Odds ratio; P-value < 0.05 was considered as significance; Yes - symptoms observed; No - no symptoms observed;

**Table S11:** Analysis of the association of allele frequency with the symptom cluster - unlawful and hetero-aggressive behavior (symptoms observed / no symptoms observed).

| rs6268 association with response Unlawful and hetero-aggressive behavior (n=1766, crude analysis)     |          |              |             |                  |         |        |        |
|-------------------------------------------------------------------------------------------------------|----------|--------------|-------------|------------------|---------|--------|--------|
| Model                                                                                                 | Genotype | No           | Yes         | OR (95% CI)      | P-value | AIC    | BIC    |
| Codominant                                                                                            | C/C      | 817 (75.2%)  | 195 (75.9%) | 1.00             | 0.34    | 1315.6 | 1331.2 |
|                                                                                                       | C/T      | 251 (23.1%)  | 54 (21%)    | 0.90 (0.65-1.26) |         |        |        |
|                                                                                                       | T/T      | 19 (1.8%)    | 8 (3.1%)    | 1.76 (0.76-4.09) |         |        |        |
| Dominant                                                                                              | C/C      | 817 (75.2%)  | 195 (75.9%) | 1.00             | 0.81    | 1315.7 | 1326.1 |
|                                                                                                       | C/T–T/T  | 270 (24.8%)  | 62 (24.1%)  | 0.96 (0.70-1.32) |         |        |        |
| Recessive                                                                                             | C/C–C/T  | 1068 (98.2%) | 249 (96.9%) | 1.00             | 0.18    | 1314   | 1324.4 |
|                                                                                                       | T/T      | 19 (1.8%)    | 8 (3.1%)    | 1.81 (0.78-4.17) |         |        |        |
| Overdominant                                                                                          | C/C-T/T  | 836 (76.9%)  | 203 (79%)   | 1.00             | 0.47    | 1315.2 | 1325.6 |
|                                                                                                       | C/T      | 251 (23.1%)  | 54 (21%)    | 0.89 (0.64-1.23) |         |        |        |
| rs10835210 association with response Unlawful and hetero-aggressive behavior (n=1746, crude analysis) |          |              |             |                  |         |        |        |
| Model                                                                                                 | Genotype | No           | Yes         | OR (95% CI)      | P-value | AIC    | BIC    |
| Codominant                                                                                            | A/A      | 278 (26%)    | 73 (28.2%)  | 1.00             | 0.68    | 1316.6 | 1332.2 |
|                                                                                                       | C/A      | 523 (48.8%)  | 119 (46%)   | 0.87 (0.63-1.20) |         |        |        |
|                                                                                                       | C/C      | 270 (25.2%)  | 67 (25.9%)  | 0.95 (0.65-1.37) |         |        |        |
| Dominant                                                                                              | A/A      | 278 (26%)    | 73 (28.2%)  | 1.00             | 0.47    | 1314.9 | 1325.3 |
|                                                                                                       | C/A-C/C  | 793 (74%)    | 186 (71.8%) | 0.89 (0.66-1.21) |         |        |        |
| Recessive                                                                                             | A/A-C/A  | 801 (74.8%)  | 192 (74.1%) | 1.00             | 0.83    | 1315.4 | 1325.8 |
|                                                                                                       | C/C      | 270 (25.2%)  | 67 (25.9%)  | 1.04 (0.76-1.41) |         |        |        |
| Overdominant                                                                                          | A/A-C/C  | 548 (51.2%)  | 140 (54%)   | 1.00             | 0.4     | 1314.7 | 1325.1 |
|                                                                                                       | C/A      | 523 (48.8%)  | 119 (46%)   | 0.89 (0.68-1.17) |         |        |        |
| rs6313 association with response Unlawful and hetero-aggressive behavior (n=1651, crude analysis)     |          |              |             |                  |         |        |        |
| Model                                                                                                 | Genotype | No           | Yes         | OR (95% CI)      | P-value | AIC    | BIC    |
| Codominant                                                                                            | G/G      | 431 (42.1%)  | 112 (46.5%) | 1.00             | 0.059   | 1231.9 | 1247.4 |
|                                                                                                       | G/A      | 480 (46.9%)  | 94 (39%)    | 0.75 (0.56-1.02) |         |        |        |
|                                                                                                       | A/A      | 112 (10.9%)  | 35 (14.5%)  | 1.20 (0.78-1.85) |         |        |        |
| Dominant                                                                                              | G/G      | 431 (42.1%)  | 112 (46.5%) | 1.00             | 0.22    | 1234.1 | 1244.4 |
|                                                                                                       | G/A-A/A  | 592 (57.9%)  | 129 (53.5%) | 0.84 (0.63-1.11) |         |        |        |
| Recessive                                                                                             | G/G-G/A  | 911 (89%)    | 206 (85.5%) | 1.00             | 0.13    | 1233.3 | 1243.6 |
|                                                                                                       | A/A      | 112 (10.9%)  | 35 (14.5%)  | 1.38 (0.92-2.08) |         |        |        |
| Overdominant                                                                                          | G/G-A/A  | 543 (53.1%)  | 147 (61%)   | 1.00             | 0.026   | 1230.6 | 1240.9 |
|                                                                                                       | G/A      | 480 (46.9%)  | 94 (39%)    | 0.72 (0.54-0.96) |         |        |        |
| rs1800955 association with response Unlawful and hetero-aggressive behavior (n=1729, crude analysis)  |          |              |             |                  |         |        |        |
| Model                                                                                                 | Genotype | No           | Yes         | OR (95% CI)      | P-value | AIC    | BIC    |
| Codominant                                                                                            | T/T      | 290 (27.1%)  | 88 (34.2%)  | 1.00             | 0.044   | 1303.7 | 1319.3 |
|                                                                                                       | T/C      | 533 (49.9%)  | 123 (47.9%) | 0.76 (0.56-1.04) |         |        |        |
|                                                                                                       | C/C      | 246 (23%)    | 46 (17.9%)  | 0.62 (0.42-0.91) |         |        |        |
| Dominant                                                                                              | T/T      | 290 (27.1%)  | 88 (34.2%)  | 1.00             | 0.025   | 1303   | 1313.4 |
|                                                                                                       | T/C-C/C  | 779 (72.9%)  | 169 (65.8%) | 0.71 (0.53-0.96) |         |        |        |
| Recessive                                                                                             | T/T-T/C  | 823 (77%)    | 211 (82.1%) | 1.00             | 0.07    | 1304.7 | 1315.1 |
|                                                                                                       | C/C      | 246 (23%)    | 46 (17.9%)  | 0.73 (0.51-1.03) |         |        |        |
| Overdominant                                                                                          | T/T-C/C  | 536 (50.1%)  | 134 (52.1%) | 1.00             | 0.56    | 1307.7 | 1318.1 |
|                                                                                                       | T/C      | 533 (49.9%)  | 123 (47.9%) | 0.92 (0.70-1.21) |         |        |        |

AIC - Akaike information criterion; BIC - Bayesian information criterion; OR - Odds ratio; P-value < 0.05 was considered as significance; Yes - symptoms observed; No - no symptoms observed;

**Table S12:** Analysis of the association of allele frequency with the symptom cluster - affective disorders (symptoms observed / no symptoms observed).

| rs6268 association with response Affective disorders (n=1766, crude analysis)     |          |             |             |                  |         |        |        |
|-----------------------------------------------------------------------------------|----------|-------------|-------------|------------------|---------|--------|--------|
| Model                                                                             | Genotype | No          | Yes         | OR (95% CI)      | P-value | AIC    | BIC    |
| Codominant                                                                        | C/C      | 675 (76.3%) | 464 (72.2%) | 1.00             | 0.16    | 2082.1 | 2098.1 |
|                                                                                   | C/T      | 196 (22.1%) | 164 (25.5%) | 1.22 (0.96-1.55) |         |        |        |
|                                                                                   | T/T      | 14 (1.6%)   | 15 (2.3%)   | 1.56 (0.75-3.26) |         |        |        |
| Dominant                                                                          | C/C      | 675 (76.3%) | 464 (72.2%) | 1.00             | 0.069   | 2080.5 | 2091.1 |
|                                                                                   | C/T-T/T  | 210 (23.7%) | 179 (27.8%) | 1.24 (0.98-1.56) |         |        |        |
| Recessive                                                                         | C/C-C/T  | 871 (98.4%) | 628 (97.7%) | 1.00             | 0.29    | 2082.7 | 2093.3 |
|                                                                                   | T/T      | 14 (1.6%)   | 15 (2.3%)   | 1.49 (0.71-3.10) |         |        |        |
| Overdominant                                                                      | C/C-T/T  | 689 (77.8%) | 479 (74.5%) | 1.00             | 0.13    | 2081.4 | 2092.1 |
|                                                                                   | C/T      | 196 (22.1%) | 164 (25.5%) | 1.20 (0.95-1.53) |         |        |        |
| rs10835210 association with response Affective disorders (n=1746, crude analysis) |          |             |             |                  |         |        |        |
| Model                                                                             | Genotype | No          | Yes         | OR (95% CI)      | P-value | AIC    | BIC    |
| Codominant                                                                        | A/A      | 208 (23.9%) | 173 (27.1%) | 1.00             | 0.37    | 2059.3 | 2075.3 |
|                                                                                   | C/A      | 440 (50.6%) | 314 (49.1%) | 0.86 (0.67-1.10) |         |        |        |
|                                                                                   | C/C      | 221 (25.4%) | 152 (23.8%) | 0.83 (0.62-1.10) |         |        |        |
| Dominant                                                                          | A/A      | 208 (23.9%) | 173 (27.1%) | 1.00             | 0.17    | 2057.4 | 2068   |
|                                                                                   | C/A-C/C  | 661 (76.1%) | 466 (72.9%) | 0.85 (0.67-1.07) |         |        |        |
| Recessive                                                                         | A/A-C/A  | 648 (74.6%) | 487 (76.2%) | 1.00             | 0.46    | 2058.8 | 2069.4 |
|                                                                                   | C/C      | 221 (25.4%) | 152 (23.8%) | 0.92 (0.72-1.16) |         |        |        |
| Overdominant                                                                      | A/A-C/C  | 429 (49.4%) | 325 (50.9%) | 1.00             | 0.57    | 2059   | 2069.6 |
|                                                                                   | C/A      | 440 (50.6%) | 314 (49.1%) | 0.94 (0.77-1.16) |         |        |        |
| rs6313 association with response Affective disorders (n=1651, crude analysis)     |          |             |             |                  |         |        |        |
| Model                                                                             | Genotype | No          | Yes         | OR (95% CI)      | P-value | AIC    | BIC    |
| Codominant                                                                        | G/G      | 351 (42.8%) | 265 (43.2%) | 1.00             | 0.46    | 1962.7 | 1978.5 |
|                                                                                   | G/A      | 365 (44.5%) | 284 (46.2%) | 1.03 (0.83-1.29) |         |        |        |
|                                                                                   | A/A      | 104 (12.7%) | 65 (10.6%)  | 0.83 (0.58-1.17) |         |        |        |
| Dominant                                                                          | G/G      | 351 (42.8%) | 265 (43.2%) | 1.00             | 0.89    | 1962.2 | 1972.8 |
|                                                                                   | G/A-A/A  | 469 (57.2%) | 349 (56.8%) | 0.99 (0.80-1.22) |         |        |        |
| Recessive                                                                         | G/G-G/A  | 716 (87.3%) | 549 (89.4%) | 1.00             | 0.22    | 1960.8 | 1971.3 |
|                                                                                   | A/A      | 104 (12.7%) | 65 (10.6%)  | 0.82 (0.59-1.13) |         |        |        |
| Overdominant                                                                      | G/G-A/A  | 455 (55.5%) | 330 (53.8%) | 1.00             | 0.51    | 1961.8 | 1972.4 |
|                                                                                   | G/A      | 365 (44.5%) | 284 (46.2%) | 1.07 (0.87-1.32) |         |        |        |
| rs1800955 association with response Affective disorders (n=1729, crude analysis)  |          |             |             |                  |         |        |        |
| Model                                                                             | Genotype | No          | Yes         | OR (95% CI)      | P-value | AIC    | BIC    |
| Codominant                                                                        | T/T      | 247 (28.5%) | 173 (27.3%) | 1.00             | 0.36    | 2046.8 | 2062.7 |
|                                                                                   | T/C      | 413 (47.6%) | 324 (51.2%) | 1.12 (0.88-1.43) |         |        |        |
|                                                                                   | C/C      | 207 (23.9%) | 136 (21.5%) | 0.94 (0.70-1.25) |         |        |        |
| Dominant                                                                          | T/T      | 247 (28.5%) | 173 (27.3%) | 1.00             | 0.62    | 2046.5 | 2057.2 |
|                                                                                   | T/C-C/C  | 620 (71.5%) | 460 (72.7%) | 1.06 (0.84-1.33) |         |        |        |
| Recessive                                                                         | T/T-T/C  | 660 (76.1%) | 497 (78.5%) | 1.00             | 0.28    | 2045.6 | 2056.2 |
|                                                                                   | C/C      | 207 (23.9%) | 136 (21.5%) | 0.87 (0.68-1.12) |         |        |        |
| Overdominant                                                                      | T/T-C/C  | 454 (52.4%) | 309 (48.8%) | 1.00             | 0.17    | 2044.9 | 2055.6 |
|                                                                                   | T/C      | 413 (47.6%) | 324 (51.2%) | 1.15 (0.94-1.41) |         |        |        |

AIC - Akaike information criterion; BIC - Bayesian information criterion; OR - Odds ratio; P-value < 0.05 was considered as significance; Yes - symptoms observed; No - no symptoms observed;

**Table S13:** Analysis of the association of allele frequency with the symptom cluster - negative symptoms (symptoms observed / no symptoms observed).

| rs6268 association with response Negative symptoms (n=1766, crude analysis)     |          |             |              |                  |         |        |        |
|---------------------------------------------------------------------------------|----------|-------------|--------------|------------------|---------|--------|--------|
| Model                                                                           | Genotype | No          | Yes          | OR (95% CI)      | P-value | AIC    | BIC    |
| Codominant                                                                      | C/C      | 336 (73.5%) | 873 (74.7%)  | 1.00             | 0.88    | 1936.6 | 1952.8 |
|                                                                                 | C/T      | 112 (24.5%) | 273 (23.4%)  | 0.94 (0.73-1.21) |         |        |        |
|                                                                                 | T/T      | 9 (2%)      | 22 (1.9%)    | 0.94 (0.43-2.06) |         |        |        |
| Dominant                                                                        | C/C      | 336 (73.5%) | 873 (74.7%)  | 1.00             | 0.61    | 1934.6 | 1945.4 |
|                                                                                 | C/T-T/T  | 121 (26.5%) | 295 (25.3%)  | 0.94 (0.73-1.20) |         |        |        |
| Recessive                                                                       | C/C-C/T  | 448 (98%)   | 1146 (98.1%) | 1.00             | 0.91    | 1934.9 | 1945.6 |
|                                                                                 | T/T      | 9 (2%)      | 22 (1.9%)    | 0.96 (0.44-2.09) |         |        |        |
| Overdominant                                                                    | C/C-T/T  | 345 (75.5%) | 895 (76.6%)  | 1.00             | 0.63    | 1934.6 | 1945.4 |
|                                                                                 | C/T      | 112 (24.5%) | 273 (23.4%)  | 0.94 (0.73-1.21) |         |        |        |
| rs10835210 association with response Negative symptoms (n=1746, crude analysis) |          |             |              |                  |         |        |        |
| Model                                                                           | Genotype | No          | Yes          | OR (95% CI)      | P-value | AIC    | BIC    |
| Codominant                                                                      | A/A      | 128 (27.8%) | 284 (24.8%)  | 1.00             | 0.23    | 1926.1 | 1942.2 |
|                                                                                 | C/A      | 212 (46.1%) | 581 (50.7%)  | 1.24 (0.95-1.60) |         |        |        |
|                                                                                 | C/C      | 120 (26.1%) | 280 (24.4%)  | 1.05 (0.78-1.42) |         |        |        |
| Dominant                                                                        | A/A      | 128 (27.8%) | 284 (24.8%)  | 1.00             | 0.21    | 1925.5 | 1936.3 |
|                                                                                 | C/A-C/C  | 332 (72.2%) | 861 (75.2%)  | 1.17 (0.92-1.49) |         |        |        |
| Recessive                                                                       | A/A-C/A  | 340 (73.9%) | 865 (75.5%)  | 1.00             | 0.5     | 1926.6 | 1937.4 |
|                                                                                 | C/C      | 120 (26.1%) | 280 (24.4%)  | 0.92 (0.72-1.18) |         |        |        |
| Overdominant                                                                    | A/A-C/C  | 248 (53.9%) | 564 (49.3%)  | 1.00             | 0.092   | 1924.2 | 1935   |
|                                                                                 | C/A      | 212 (46.1%) | 581 (50.7%)  | 1.21 (0.97-1.50) |         |        |        |
| rs6313 association with response Negative symptoms (n=1651, crude analysis)     |          |             |              |                  |         |        |        |
| Model                                                                           | Genotype | No          | Yes          | OR (95% CI)      | P-value | AIC    | BIC    |
| Codominant                                                                      | G/G      | 175 (40.2%) | 473 (43.6%)  | 1.00             | 0.39    | 1823.5 | 1839.5 |
|                                                                                 | G/A      | 208 (47.8%) | 477 (44%)    | 0.85 (0.67-1.08) |         |        |        |
|                                                                                 | A/A      | 52 (11.9%)  | 134 (12.4%)  | 0.95 (0.66-1.37) |         |        |        |
| Dominant                                                                        | G/G      | 175 (40.2%) | 473 (43.6%)  | 1.00             | 0.22    | 1821.9 | 1832.5 |
|                                                                                 | G/A-A/A  | 260 (59.8%) | 611 (56.4%)  | 0.87 (0.69-1.09) |         |        |        |
| Recessive                                                                       | G/G-G/A  | 383 (88%)   | 950 (87.6%)  | 1.00             | 0.83    | 1823.3 | 1834   |
|                                                                                 | A/A      | 52 (11.9%)  | 134 (12.4%)  | 1.04 (0.74-1.46) |         |        |        |
| Overdominant                                                                    | G/G-A/A  | 227 (52.2%) | 607 (56%)    | 1.00             | 0.18    | 1821.6 | 1832.2 |
|                                                                                 | G/A      | 208 (47.8%) | 477 (44%)    | 0.86 (0.69-1.07) |         |        |        |
| rs1800955 association with response Negative symptoms (n=1729, crude analysis)  |          |             |              |                  |         |        |        |
| Model                                                                           | Genotype | No          | Yes          | OR (95% CI)      | P-value | AIC    | BIC    |
| Codominant                                                                      | T/T      | 134 (29.4%) | 309 (27.1%)  | 1.00             | 0.44    | 1913.4 | 1929.5 |
|                                                                                 | T/C      | 228 (50%)   | 565 (49.6%)  | 1.07 (0.83-1.39) |         |        |        |
|                                                                                 | C/C      | 94 (20.6%)  | 265 (23.3%)  | 1.22 (0.90-1.67) |         |        |        |
| Dominant                                                                        | T/T      | 134 (29.4%) | 309 (27.1%)  | 1.00             | 0.36    | 1912.2 | 1922.9 |
|                                                                                 | T/C-C/C  | 322 (70.6%) | 830 (72.9%)  | 1.12 (0.88-1.42) |         |        |        |
| Recessive                                                                       | T/T-T/C  | 362 (79.4%) | 874 (76.7%)  | 1.00             | 0.25    | 1911.7 | 1922.4 |
|                                                                                 | C/C      | 94 (20.6%)  | 265 (23.3%)  | 1.17 (0.90-1.52) |         |        |        |
| Overdominant                                                                    | T/T-C/C  | 228 (50%)   | 574 (50.4%)  | 1.00             | 0.89    | 1913   | 1923.7 |
|                                                                                 | T/C      | 228 (50%)   | 565 (49.6%)  | 0.98 (0.79-1.22) |         |        |        |

AIC - Akaike information criterion; BIC - Bayesian information criterion; OR - Odds ratio; P-value < 0.05 was considered as significance; Yes - symptoms observed; No - no symptoms observed;
